# Supplementary material for: Polycyclic aromatic hydrocarbons and ecotoxicological characterization of sediments from the Huaihe River, China
Source: Royal Society of Chemistry journal article supplement (doi:10.1039/c0em00604a), 2011-01-01
Supplement: c0em00604a.pdf [file c0em00604a.pdf]

**Journal of Environmental Monitoring**

**Supplementary materials**

**Polycyclic aromatic hydrocarbons and ecotoxicological  
characterization of sediments from the Huaihe River, China**

**Jie Fu, Yan-Hua Ding, Luo Li, Sheng Sheng, Teng Wen, Lu-Ji Yu, Wu Chen,  
Shu-Qing An, Hai-Liang Zhu\***

**Contents:**

|                                                                                |          |
|--------------------------------------------------------------------------------|----------|
| <b>Description of sampling sites (Table S1) .....</b>                          | <b>2</b> |
| <b>Source of PAHs (containing Table S2 and Fig. S1) .....</b>                  | <b>2</b> |
| <b>Assessment of sediment toxicity (containing Fig. S1 and Table S3) .....</b> | <b>4</b> |
| <b>Supplementary references .....</b>                                          | <b>5</b> |

---

\* *Corresponding author, State Key Laboratory of Pharmaceutical Biotechnology, School of Life Sciences, Nanjing University, Nanjing 210093, China. Email: zhuhl@nju.edu.cn*

## Description of sampling sites

**Table S1** Sampling sites and description

| Sampling sites |                                   | Description                                                                                                                                                                                                                        |
|----------------|-----------------------------------|------------------------------------------------------------------------------------------------------------------------------------------------------------------------------------------------------------------------------------|
| Name           | Location                          |                                                                                                                                                                                                                                    |
| XY             | Lat 32°18'50",<br>Long 114°04'04" | The river was narrow and affected by domestic effluent from the nearby village. The samples were drab and hard plastic with aquatic weeds.                                                                                         |
| HN             | Lat 32°40'14",<br>Long 117°01'45" | There were many dredgers on the river and oil stain on the surface of river. Location affected by the industrial effluent from nearby chemical plant and power plant. The samples were black and flow plastic with no organisms.   |
| BB             | Lat 32°57'50",<br>Long 117°25'09" | There were some aquatic weeds and solid waste on the river. The water was turbid and affected by the industrial effluent from nearby chemical plant. The samples were dark brown and flow plastic with a few of shellfish.         |
| XuY            | Lat 32°02'21",<br>Long 118°29'40" | The river was narrow and affected by the effluent from a nearby hospital. The samples were grey and flow plastic with some shellfish.                                                                                              |
| FY             | Lat 32°53'29",<br>Long 115°50'32" | The river was gentle and a number of plants were on the bank. The samples were yellow and hard plastic with a few of shellfish.                                                                                                    |
| MC             | Lat 33°11'14",<br>Long 116°41'52" | There were a few boats at riverside and some aquatic plants on the surface of river. The samples were drab and flow plastic with aquatic weeds.                                                                                    |
| ZZ             | Lat 34°85'38",<br>Long 113°63'75" | There is a bridge on the river with two garbage dumps at the bridge heads. A resident family was under the bridge. A food factory was nearby with a sewage outfall into the river. The river bank was semi-stony and semi-terrene. |

## Source of PAHs

**Table S2** Parent PAH ratios in the sediment samples from the Huaihe River, China

| Sample | Parent PAH ratios |         |                 |
|--------|-------------------|---------|-----------------|
|        | Fla/Pyr           | Phe/Ant | Fla/(Fla + Pyr) |
| XY     | 1.29              | 10.06   | 0.56            |
| HN     | 2.27              | 1.88    | 0.69            |
| BB     | 1.87              | 1.20    | 0.65            |
| XuY    | 3.20              | 0.27    | 0.76            |
| FY     | 1.93              | 0.79    | 0.66            |
| MC     | 1.56              | 10.43   | 0.61            |
| ZZ     | 1.82              | 0.33    | 0.64            |

### Principal component analysis (PCA) analysis

PCA as the multivariate analytical tool is used to reduce a set of original variables (measured PAHs content in the sediment samples) and to extract a small number of latent factors (principal components, PCs) for analyzing relationships among the observed variables. As a result of an effective ordination process, the first PC accounts for the greatest proportion of the original variance, while the second as well as the following PCs progressively explain smaller amounts of data variation.

In this study, concentrations of 16 PAHs as active variables and 7 samples as subjects were selected. The majority of the variance (88.92%) of the scaled data was explained by three eigenvectors-principal components. The first principal component (PC1) can explain 51.47% of the total variance, and the second (PC2) and the third (PC3) explained 27.78% and 9.67% of the total variance, respectively.

The principal component plot (Fig. S1) shows the loadings for the individual PAHs. Fang et al.<sup>S1</sup> reported that high loadings of Pyr, Flu, BghiP, Fl, Chr, BaP indicated incomplete combustion, pyrolysis of fuel and oil burning. Basically, factors heavy-weighted by BkF, BaP, BghiP, InP, Pyr, Chr, Flu, and BaA were identified as pyrolytic origin, whilst the compounds of Nap, Phe, Ant, Ace and Acy were indicative of petrogenic origin of PAHs.<sup>S2</sup> In this study, heavy-weighted PAHs, DahA, BaP,

BghiP, InP, BaA, BkF, BbF and Fl, constituted the first cluster. This confirms the results obtained from the ratios of specific PAH compounds that the PAH contamination in the sediments mainly resulted from a pattern of pyrolytic sources.

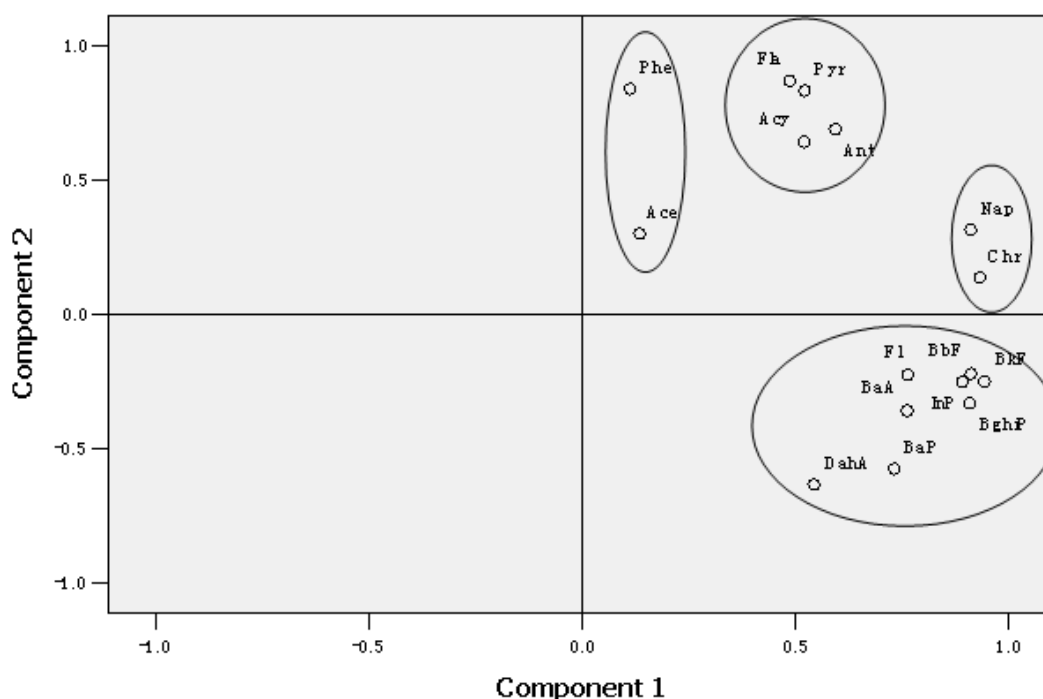

**Fig. S1** The loading plot of PCA of PAHs from sediments.

## Assessment of sediment toxicity

### Calculation of TEQ

BaP is the only PAH for which toxicological data are sufficient for derivation of a carcinogenic potency factor among all known potentially carcinogenic PAHs.<sup>S3</sup> The toxic equivalency factors (TEFs) were used to quantify the carcinogenicity of other PAHs relative to BaP and to estimate BaP-equivalent doses (BaP<sub>eq</sub> dose).<sup>S5</sup> Calculated TEFs for BaA, BaP, BbF, BkF, InP, DahA, and Chr are 0.1, 1, 0.1, 0.01, 0.1, 1, and 0.001, respectively, according to the USEPA. In this study, we converted the above mentioned seven PAH concentrations into one toxic concentration for each site using the corresponding TEFs. The total BaP toxicity equivalent (TEQ) for all PAHs was calculated as:

$$Total\ TEQ = \sum_i C_i \times TEF_i$$

where  $C_i$  was the concentrations of individual PAH (ng/g d.w.) and  $TEF_i$  was its corresponding toxic equivalency factor.

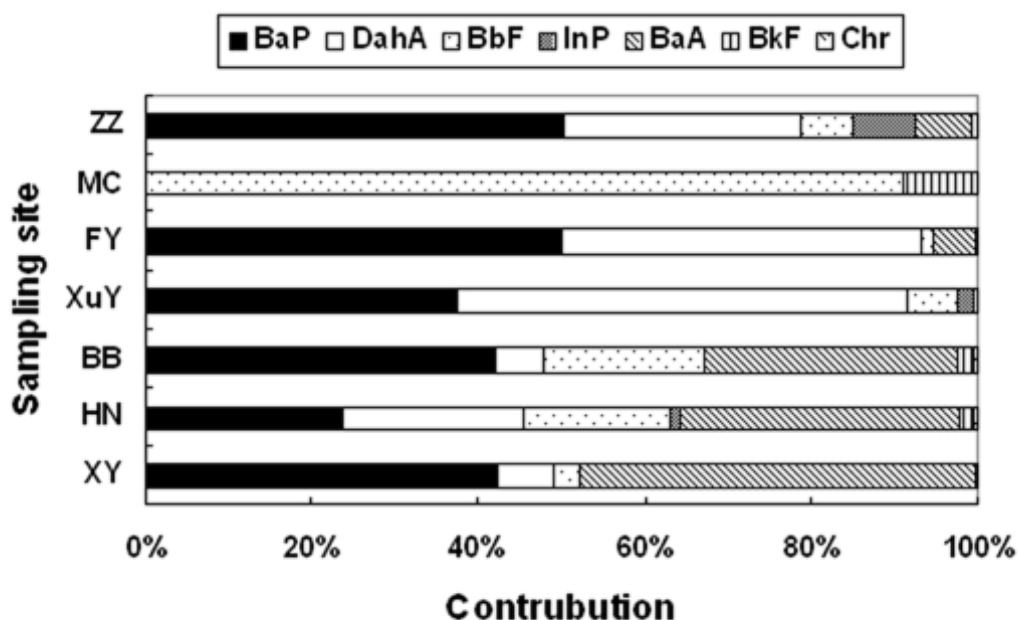

**Fig. S2** Contributions of BaP, DahA, BbF, InP, BaA, BkF and Chr to the total TEQ.

**Table S3** A comparison of total TEQ in sediments (ng/g d.w.)

| Location                            | Range      | Mean  | Reference  |
|-------------------------------------|------------|-------|------------|
| Meiliang Bay, Taihu Lake, China     | 94-856     | 407   | S5         |
| Guba Pechenga, Barents, Sea, Russia | 11-300     | < 120 | S6         |
| Sundarban Mangrove, Wetland, India  | 6.95-119   | 59    | S7         |
| Gulf of Gemlik, Marmara Sea, Turkey | 5.6-1838   | 134   | S8         |
| coastal lagoons in central Vietnam  | 2-98       | 21    | S9         |
| Huaihe River, China                 | 0.01-194.1 | 65.9  | This study |

### Supplementary references

S1 G. C. Fang, Y. S. Wu, J. C. Chen, C. N. Chang and T. T. Ho, Characteristic of

- polycyclic aromatic hydrocarbon concentrations and source identification for fine and coarse particulates at Taichung Harbor and near Taiwan Strait during 2004-2005, *Sci. Total Environ.*, 2006, **366**, 729-738.
- S2 G. D. Luca, A. Furesi, R. Leardi, G. Micera, A. Panzanelli, P. C. Piu and G. Sanna, Polycyclic aromatic hydrocarbons assessment in the sediments of the Porto Torres Harbor (Northern Sardinia, Italy), *Mar. Chem.*, 2004, **86**, 15-32.
- S3 C. A. Peters, C. D. Knightes and D. G. Brown, Long-term composition dynamics of PAH-containing NAPLs and implications for risk assessment, *Environ. Sci. Technol.*, 1999, **33**, 4499-507.
- S4 M. Nadal, M. Schuhmacher and J. L. Domingo, Levels of PAHs in soil and vegetation samples from Tarragona County, Spain, *Environ. Pollut.*, 2004, **132**, 1-11.
- S5 M. Qiao, C. X. Wang, S. B. Huang, D. H. Wang and Z. J. Wang, Composition, sources, and potential toxicological significance of PAHs in the surface sediments of Meiliang Bay, Taihu Lake, China, *Environ. Int.*, 2006, **32**, 28-33.
- S6 V. M. Savinov, T. N. Savinova, G. G. Matishov, S. Dahle and K. Næs, Polycyclic aromatic hydrocarbons (PAHs) and organochlorines (OCs) in bottom sediments of the Guba Pechenga, Barents Sea, Russia, *Sci. Total. Environ.*, 2003, **306**, 39-56.
- S7 C. Domínguez, S. K. Karkar, A. Bhattacharya, M. Chatterjee, B. D. Bhattacharya, E. Jover, J. Albaigés, J. M. Bayona, M. A. Alam and K. K. Satpathy, Quantification of source identification of polycyclic aromatic hydrocarbons in core sediments from Sundarban Mangrove Wetland, India, *Arch. Environ. Contam. Toxicol.*, 2010, **59**, 49-61.
- S8 S. Ünlü and B. Alpar, Evolution of potential ecological impacts of the bottom sediment from the Gulf of Gemlik; Marmara Sea, Turkey, *Bull. Environ. Contam. Toxicol.*, 2009, **83**, 903-906.
- S9 S. Giuliani, M. Sprovieri, M. Frignani, N. H. Cu, C. Mugnai, L. G. Bellucci, S. Albertazzi, S. Romano, M. L. Feo and E. Marsella, Presence and origin of polycyclic aromatic hydrocarbon in sediments of nine coastal lagoons in central Vietnam, *Mar. Pollut. Bull.*, 2008, **56**, 1504-1512.
